# Supplementary material
Source: PubMed Central journal article supplement (PMC4679527)
Supplement: NIHMS725384-supplement-supplemental_material.pdf [file NIHMS725384-supplement-supplemental_material.pdf]

## SUPPLEMENTAL MATERIAL

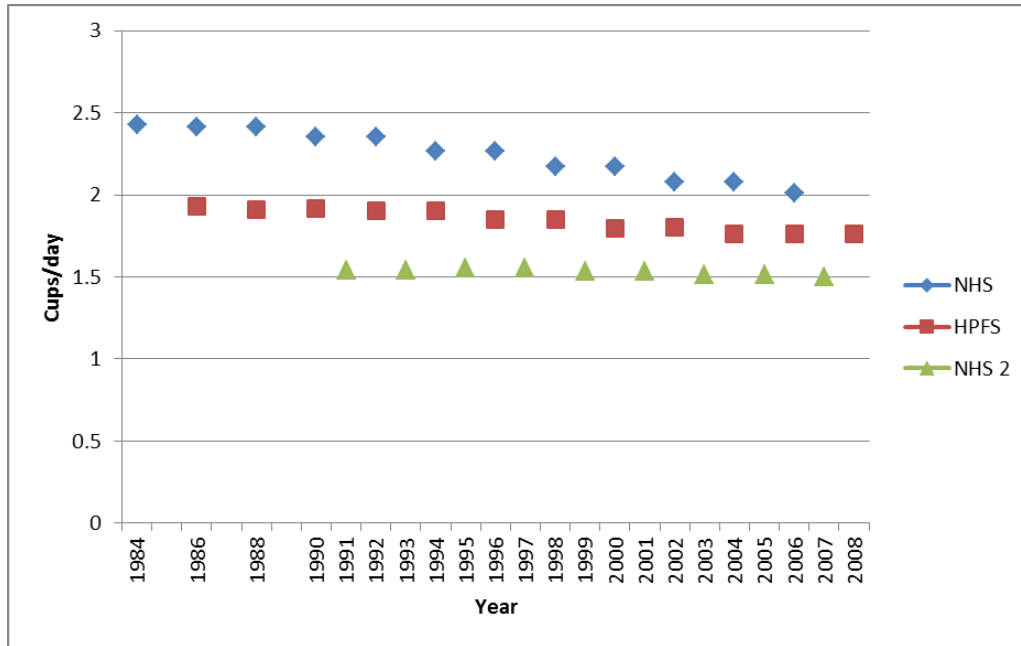

**Supplemental Figure 1. Mean coffee consumption in NHS, NHS 2, and HPFS over follow-up period.**

**Supplemental Table 1. Categories for causes of death.**

| Causes of death        | ICD-8 code                |
|------------------------|---------------------------|
| Cardiovascular disease | 390-458                   |
| Heart disease          | 390-429, 440-458          |
| Stroke                 | 430-438                   |
| Cancer                 | 140-207                   |
| Colorectal cancer      | 153, 154                  |
| Lung cancer            | 162                       |
| Pancreatic cancer      | 157                       |
| Breast cancer          | 174                       |
| Ovary cancer           | 183                       |
| Prostate cancer        | 185                       |
| Respiratory disease    | 460-519                   |
| Diabetes               | 250                       |
| Neurological disease   | 290, 340, 342, 348        |
| Injury                 | 800-950, 959-999          |
| Suicide                | 950-959                   |
| All other causes       | The rest of the ICD codes |

**Supplemental Table 2. The disease composition of overall mortality.**

|                              | NHS  | NHS 2 | HPFS | Total population |
|------------------------------|------|-------|------|------------------|
| Cardiovascular disease       | 3844 | 211   | 3781 | 7836             |
| Coronary heart disease       | 2545 | 157   | 2966 | 5668             |
| Stroke                       | 1062 | 43    | 750  | 1855             |
| Other diseases               | 4667 | 680   | 2925 | 8272             |
| Respiratory disease          | 1383 | 52    | 924  | 2359             |
| Injury                       | 144  | 10    | 500  | 654              |
| Neurological disease         | 460  | 48    | 22   | 530              |
| Suicide                      | 84   | 98    | 192  | 374              |
| Type 2 diabetes              | 214  | 32    | 92   | 338              |
| Renal disease                | 48   | 3     | 26   | 77               |
| Cancer                       | 6624 | 922   | 3970 | 11516            |
| Lung cancer                  | 1596 | 107   | 745  | 2448             |
| Breast cancer                | 961  | 261   | 0    | 1222             |
| Premenopausal breast cancer  | 42   | 83    | 0    | 125              |
| Postmenopausal breast cancer | 911  | 178   | 0    | 1089             |
| Colorectal cancer            | 549  | 69    | 417  | 1035             |
| Pancreatic cancer            | 487  | 49    | 338  | 874              |
| Non-Hodgkin lymphoma         | 398  | 54    | 295  | 747              |
| Prostate cancer              | 0    | 0     | 572  | 572              |
| Ovary cancer                 | 496  | 82    | 0    | 578              |
| Brain cancer                 | 195  | 58    | 167  | 420              |
| Leukemia                     | 193  | 30    | 175  | 398              |
| Myeloma                      | 162  | 7     | 145  | 314              |
| Renal cell cancer            | 142  | 10    | 119  | 271              |
| Bladder cancer               | 107  | 5     | 160  | 272              |
| Skin cancer                  | 105  | 26    | 126  | 257              |
| Endometrial cancer           | 211  | 31    | 0    | 242              |
| Esophagus cancer             | 71   | 5     | 133  | 209              |
| Stomach cancer               | 102  | 9     | 87   | 198              |
| Head and neck cancer         | 83   | 8     | 84   | 175              |

---

|                        |        |       |        |        |
|------------------------|--------|-------|--------|--------|
| Liver cancer           | 72     | 5     | 60     | 137    |
| Gall bladder cancer    | 89     | 13    | 32     | 134    |
| Small intestine cancer | 26     | 8     | 9      | 43     |
| Cervix cancer          | 28     | 11    | 0      | 39     |
| Hodgkin lymphoma       | 14     | 4     | 11     | 29     |
| Total mortality        | 17,468 | 2,056 | 12,432 | 31,956 |

---

**Supplemental Table 3. HRs (95% CI) for the association between consumption of total coffee and risk of cause-specific mortality**

|                                                            | 0 cup/d | ≤ 1 cup/d            | 1.1-3 cups/d         | 3.1-5 cups/d         | >5 cups/d            | <b>P</b> non-linearity* |
|------------------------------------------------------------|---------|----------------------|----------------------|----------------------|----------------------|-------------------------|
| <b>CVD mortality (7836 cases)</b>                          | 1.00    | 1.01<br>(0.93, 1.09) | 0.95<br>(0.87, 1.01) | 0.88<br>(0.81, 0.96) | 1.02<br>(0.91, 1.14) | 0.49                    |
| <i>CHD mortality (5668 cases)</i>                          | 1.00    | 0.98<br>(0.90, 1.07) | 0.92<br>(0.85, 1.01) | 0.90<br>(0.81, 0.99) | 1.03<br>(0.91, 1.17) | 0.21                    |
| <i>Stroke mortality (1855 cases)</i>                       | 1.00    | 1.05<br>(0.89, 1.23) | 0.95<br>(0.81, 1.11) | 0.81<br>(0.67, 0.97) | 1.00<br>(0.79, 1.25) | 0.89                    |
| <b>Cancer mortality (11,516 cases)</b>                     | 1.00    | 1.01<br>(0.94, 1.08) | 1.01<br>(0.95, 1.08) | 1.03<br>(0.95, 1.10) | 1.16<br>(1.06, 1.27) | 0.88                    |
| <i>Colorectal cancer mortality (1,035 cases)</i>           | 1.00    | 1.03<br>(0.83, 1.28) | 0.95<br>(0.77, 1.17) | 0.95<br>(0.75, 1.20) | 0.94<br>(0.69, 1.29) | 0.91                    |
| <i>Lung cancer mortality (2448 cases)</i>                  | 1.00    | 1.03<br>(0.86, 1.23) | 1.15<br>(0.98, 1.36) | 1.39<br>(1.17, 1.65) | 1.82<br>(1.51, 2.19) | 0.39                    |
| <i>Pancreatic cancer mortality (874 cases)</i>             | 1.00    | 1.35<br>(1.05, 1.72) | 1.17<br>(0.92, 1.49) | 1.08<br>(0.83, 1.42) | 1.25<br>(0.89, 1.74) | 0.64                    |
| <i>Liver cancer (137 cases)</i>                            | 1.00    | 1.72<br>(0.89, 3.33) | 1.37<br>(0.71, 2.61) | 1.76<br>(0.88, 3.52) | 0.62<br>(0.19, 1.94) | 0.53                    |
| <i>Breast cancer mortality (1222 cases)</i>                | 1.00    | 0.97<br>(0.81, 1.18) | 0.97<br>(0.81, 1.16) | 0.92<br>(0.75, 1.14) | 1.00<br>(0.77, 1.31) | 0.50                    |
| <i>Postmenopausal breast cancer mortality (1089 cases)</i> | 1.00    | 0.96<br>(0.78, 1.19) | 0.94<br>(0.78, 1.14) | 0.93<br>(0.74, 1.16) | 1.05<br>(0.80, 1.39) | 0.80                    |
| <i>Ovary cancer mortality (578 cases)</i>                  | 1.00    | 0.72<br>(0.54, 0.97) | 0.88<br>(0.68, 1.14) | 0.82<br>(0.61, 1.10) | 0.90<br>(0.62, 1.31) | 0.73                    |
| <i>Endometrial Cancer (242 cases)</i>                      | 1.00    | 1.11<br>(0.70, 1.75) | 1.19<br>(0.78, 1.82) | 1.12<br>(0.69, 1.82) | 1.18<br>(0.63, 2.21) | 0.17                    |
| <i>Prostate cancer mortality (572 cases)</i>               | 1.00    | 0.76<br>(0.59, 0.98) | 0.76<br>(0.59, 0.98) | 0.73<br>(0.54, 1.00) | 0.50<br>(0.30, 0.85) | 0.08                    |
| <b>Respiratory disease mortality (2,359 cases)</b>         | 1.00    | 0.90<br>(0.77, 1.05) | 0.84<br>(0.73, 0.97) | 1.04<br>(0.89, 1.22) | 1.32<br>(1.10, 1.58) | < 0.001                 |

|                                                       |      |                      |                      |                      |                      |         |
|-------------------------------------------------------|------|----------------------|----------------------|----------------------|----------------------|---------|
| <b>Neurological disease mortality<br/>(530 cases)</b> | 1.00 | 0.91<br>(0.68, 1.21) | 0.80<br>(0.61, 1.04) | 0.69<br>(0.50, 0.95) | 0.60<br>(0.38, 0.94) | 0.17    |
| <b>Diabetes mortality<br/>(338 cases)</b>             | 1.00 | 0.90<br>(0.65, 1.24) | 0.59<br>(0.43, 0.82) | 0.65<br>(0.43, 0.97) | 0.57<br>(0.32, 1.01) | 0.03    |
| <b>Injury mortality<br/>(654 cases)</b>               | 1.00 | 0.88<br>(0.68, 1.13) | 0.91<br>(0.71, 1.16) | 0.84<br>(0.62, 1.12) | 0.98<br>(0.67, 1.44) | 0.58    |
| <b>Suicide<br/>(374 cases)</b>                        | 1.00 | 1.10<br>(0.81, 1.48) | 0.76<br>(0.56, 1.03) | 0.58<br>(0.39, 0.86) | 0.54<br>(0.31, 0.92) | 0.70    |
| <b>Other disease mortality<br/>(8,272 cases)</b>      | 1.00 | 0.88<br>(0.82, 0.95) | 0.80<br>(0.75, 0.86) | 0.81<br>(0.74, 0.87) | 0.79<br>(0.71, 0.88) | < 0.001 |

\* A likelihood ratio test was performed.

The model adjusted for age, baseline disease status (hypertension, hypercholesterolemia, diabetes), BMI (< 20.9, 21-22.9, 23-24.9, 25-29.9, 30-34.9,  $\geq 35$  kg/m<sup>2</sup>), physical activity (< 3, 3-8.9, 9-17.9, 18-26.9,  $\geq 27$  MET-h/wk), overall dietary pattern (AHEI score, in quintiles), total energy intake (quintiles), smoking status (never, former (1 - 4 cigarettes/d), former (5 - 14 cigarettes/d), former (15 - 24 cigarettes/d), former (25 - 34 cigarettes/d), former (35 - 44 cigarettes/d), former ( $\geq 45$  cigarettes/d), former (unknown cigarettes/d), current (1 - 4 cigarettes/d), current (5 - 14 cigarettes/d), current (15 - 24 cigarettes/d), current (25 - 34 cigarettes/d), current (35 - 44 cigarettes/d), current ( $\geq 45$  cigarettes/d), current (unknown cigarettes/d)), sugar-sweetened beverages consumption (quintiles) and alcohol consumption (0, 0-5, 5-10, 10-15,  $\geq 15$  g/d). We additionally adjusted for menopausal status (yes vs. no), and postmenopausal hormone use (yes vs. no) for women. Caffeinated and decaffeinated coffee adjusted for each other.

**Supplemental Table 4. Stratified analysis for the association between coffee consumption and risk of total mortality**

|                                             | Categories of total coffee consumption |                     |                     |                     |                     | P for interaction† |
|---------------------------------------------|----------------------------------------|---------------------|---------------------|---------------------|---------------------|--------------------|
|                                             | 0                                      | ≤ 1 cup/d           | 1.1-3 cups/d        | 3.1-5 cups/d        | >5 cups/d           |                    |
| <b>Stratified by age</b>                    |                                        |                     |                     |                     |                     | 0.003              |
| <i>Age ≤ 70 years</i>                       |                                        |                     |                     |                     |                     |                    |
| Multivariate-adjusted hazard ratio (95% CI) | 1.00                                   | 0.97<br>(0.92-1.03) | 0.87<br>(0.83-0.92) | 0.86<br>(0.81-0.92) | 0.96<br>(0.88-1.04) |                    |
| <i>Age &gt; 70 years</i>                    |                                        |                     |                     |                     |                     |                    |
| Multivariate-adjusted hazard ratio (95% CI) | 1.00                                   | 0.96<br>(0.91-1.01) | 0.93<br>(0.89-0.98) | 0.95<br>(0.89-1.00) | 1.06<br>(0.99-1.14) |                    |
| <b>Stratified by BMI</b>                    |                                        |                     |                     |                     |                     | 0.076              |
| <i>BMI ≤ 25 kg/m<sup>2</sup></i>            |                                        |                     |                     |                     |                     |                    |
| Multivariate-adjusted hazard ratio (95% CI) | 1.00                                   | 0.93<br>(0.88-0.99) | 0.92<br>(0.87-0.97) | 0.93<br>(0.87-0.99) | 1.03<br>(0.95-1.11) |                    |
| <i>BMI &gt; 25 kg/m<sup>2</sup></i>         |                                        |                     |                     |                     |                     |                    |
| Multivariate-adjusted hazard ratio (95% CI) | 1.00                                   | 0.97<br>(0.92-1.02) | 0.90<br>(0.86-0.95) | 0.91<br>(0.86-0.97) | 0.98<br>(0.91-1.05) |                    |
| <b>Stratified by aHEI</b>                   |                                        |                     |                     |                     |                     | 0.96               |
| <i>aHEI ≤ median level</i>                  |                                        |                     |                     |                     |                     |                    |
| Multivariate-adjusted hazard ratio (95% CI) | 1.00                                   | 0.95<br>(0.90-1.00) | 0.90<br>(0.86-0.95) | 0.92<br>(0.87-0.98) | 1.00<br>(0.93-1.07) |                    |
| <i>aHEI &gt; median level</i>               |                                        |                     |                     |                     |                     |                    |
| Multivariate-adjusted hazard ratio (95% CI) | 1.00                                   | 0.95<br>(0.90-1.01) | 0.92<br>(0.87-0.97) | 0.94<br>(0.88-1.00) | 1.04<br>(0.96-1.13) |                    |
| <b>Stratified by physical activity</b>      |                                        |                     |                     |                     |                     | 0.20               |
| <i>Physical activity ≤ median level</i>     |                                        |                     |                     |                     |                     |                    |
| Multivariate-adjusted hazard ratio (95% CI) | 1.00                                   | 0.91<br>(0.87-0.96) | 0.88<br>(0.84-0.92) | 0.92<br>(0.87-0.97) | 1.00<br>(0.93-1.07) |                    |

|                                                      |      |                      |                      |                      |                      |         |
|------------------------------------------------------|------|----------------------|----------------------|----------------------|----------------------|---------|
| <i>Physical activity &gt; median level</i>           |      |                      |                      |                      |                      |         |
| Multivariate-adjusted hazard ratio (95% CI)          | 1.00 | 1.01<br>(0.94-1.07)  | 0.96<br>(0.91-1.02)  | 0.95<br>(0.88-1.02)  | 1.06<br>(0.97-1.16)  |         |
| <b>Stratified by smoking status</b>                  |      |                      |                      |                      |                      | < 0.001 |
| <i>Never</i>                                         |      |                      |                      |                      |                      |         |
| Multivariate-adjusted hazard ratio (95% CI)          | 1.00 | 0.94<br>(0.89-1.00)  | 0.92<br>(0.87-0.97)  | 0.85<br>(0.79-0.92)  | 0.88<br>(0.78-0.99)  |         |
| <i>Ever</i>                                          |      |                      |                      |                      |                      |         |
| Multivariate-adjusted hazard ratio (95% CI)          | 1.00 | 0.96<br>(0.91-1.01)  | 0.92<br>(0.87-0.97)  | 0.96<br>(0.91-1.01)  | 1.04<br>(0.98-1.11)  |         |
| <b>Stratified by sex</b>                             |      |                      |                      |                      |                      | 0.39    |
| <i>Female</i>                                        |      |                      |                      |                      |                      |         |
| Multivariate-adjusted hazard ratio (95% CI)          | 1.00 | 0.93<br>(0.88-0.97)  | 0.89<br>(0.85-0.93)  | 0.93<br>(0.88-0.98)  | 1.02<br>(0.95-1.08)  |         |
| <i>Male</i>                                          |      |                      |                      |                      |                      |         |
| Multivariate-adjusted hazard ratio (95% CI)          | 1.00 | 1.00<br>(0.94, 1.06) | 0.97<br>(0.91, 1.03) | 0.96<br>(0.90, 1.03) | 1.05<br>(0.96, 1.14) |         |
| <b>Stratify by individual cohort (cohort effect)</b> |      |                      |                      |                      |                      |         |
| NHS                                                  |      |                      |                      |                      |                      |         |
| Multivariate-adjusted hazard ratio (95% CI)          | 1.00 | 0.94<br>(0.88, 1.00) | 0.90<br>(0.85, 0.95) | 0.92<br>(0.88, 0.98) | 1.02<br>(0.96, 1.10) |         |
| NHS 2                                                |      |                      |                      |                      |                      |         |
| Multivariate-adjusted hazard ratio (95% CI)          | 1.00 | 0.92<br>(0.81, 1.04) | 0.85<br>(0.75, 0.95) | 0.86<br>(0.73, 1.01) | 0.97<br>(0.78, 1.20) |         |
| HPFS                                                 |      |                      |                      |                      |                      |         |



|                                             |      |              |              |              |              |
|---------------------------------------------|------|--------------|--------------|--------------|--------------|
| Multivariate-adjusted hazard ratio (95% CI) | 1.00 | 1.00         | 0.97         | 0.96         | 1.05         |
|                                             |      | (0.94, 1.06) | (0.91, 1.03) | (0.90, 1.03) | (0.96, 1.14) |

---

Abbreviations: CI, confidence interval; BMI, body mass index; aHEI, alternative health eating index

\* Models were adjusted for age, baseline disease status (hypertension, hypercholesterolemia, diabetes), BMI (< 20.9, 21-22.9, 23-24.9, 25-29.9, 30-34.9,  $\geq 35$  kg/m<sup>2</sup>), physical activity (< 3, 3-8.9, 9-17.9, 18-26.9,  $\geq 27$  MET-h/wk), overall dietary pattern (AHEI score, in quintiles), total energy intake (quintiles), smoking status (never, former (1 - 4 cigarettes/d), former (5 - 14 cigarettes/d), former (15 - 24 cigarettes/d), former (25 - 34 cigarettes/d), former (35 - 44 cigarettes/d), former ( $\geq 45$  cigarettes/d), former (unknown cigarettes/d), current (1 - 4 cigarettes/d), current (5 - 14 cigarettes/d), current (15 - 24 cigarettes/d), current (25 - 34 cigarettes/d), current (35 - 44 cigarettes/d), current ( $\geq 45$  cigarettes/d), current (unknown cigarettes/d)), sugar-sweetened beverages consumption (quintiles) and alcohol consumption (0, 0-5, 5-10, 10-15,  $\geq 15$  g/d). We additionally adjusted for menopausal status (yes vs. no), and postmenopausal hormone use (yes vs. no) for women.

\* † Likelihood ratio tests were performed.

**Supplemental Table 5. The tests of proportional hazard assumption in NHS, NHS 2, and HPFS.**

|                                             | Categories of total coffee consumption |                      |                      |                      |                      | P <sub>interaction</sub> † |
|---------------------------------------------|----------------------------------------|----------------------|----------------------|----------------------|----------------------|----------------------------|
|                                             | 0                                      | ≤ 1 cup/d            | 1.1-3 cups/d         | 3.1-5 cups/d         | >5 cups/d            |                            |
| <b>Stratified by follow-up time in NHS</b>  |                                        |                      |                      |                      |                      | < 0.001                    |
| < 20 years                                  |                                        |                      |                      |                      |                      |                            |
| Multivariate-adjusted hazard ratio (95% CI) | 1.00                                   | 0.93<br>(0.85, 1.02) | 0.87<br>(0.80, 0.94) | 0.84<br>(0.76, 0.92) | 0.89<br>(0.79, 0.99) |                            |
| ≥ 20 years                                  |                                        |                      |                      |                      |                      |                            |
| Multivariate-adjusted hazard ratio (95% CI) | 1.00                                   | 0.94<br>(0.87, 1.01) | 0.93<br>(0.87, 0.99) | 1.00<br>(0.92, 1.07) | 1.12<br>(1.02, 1.22) |                            |
| <b>Stratified by follow-up time in NHS2</b> |                                        |                      |                      |                      |                      | 0.49                       |
| < 14 years                                  |                                        |                      |                      |                      |                      |                            |
| Multivariate-adjusted hazard ratio (95% CI) | 1.00                                   | 0.92<br>(0.74, 1.13) | 0.99<br>(0.81, 1.21) | 0.96<br>(0.74, 1.25) | 1.04<br>(0.72, 1.48) |                            |
| ≥ 14 years                                  |                                        |                      |                      |                      |                      |                            |
| Multivariate-adjusted hazard ratio (95% CI) | 1.00                                   | 0.91<br>(0.78, 1.06) | 0.78<br>(0.67, 0.91) | 0.83<br>(0.68, 1.00) | 1.01<br>(0.78, 1.31) |                            |
| <b>Stratified by follow-up time in HPFS</b> |                                        |                      |                      |                      |                      | 0.53                       |
| < 20 years                                  |                                        |                      |                      |                      |                      |                            |
| Multivariate-adjusted hazard ratio (95% CI) | 1.00                                   | 1.00<br>(0.92, 1.09) | 0.96<br>(0.88, 1.04) | 0.93<br>(0.85, 1.03) | 1.00<br>(0.88, 1.14) |                            |
| ≥ 20 years                                  |                                        |                      |                      |                      |                      |                            |
| Multivariate-adjusted hazard ratio (95% CI) | 1.00                                   | 0.98<br>(0.90, 1.07) | 0.95<br>(0.87, 1.03) | 0.96<br>(0.87, 1.06) | 1.03<br>(0.90, 1.17) |                            |

\* Models were adjusted for age, baseline disease status (hypertension, hypercholesterolemia, diabetes), BMI (< 20.9, 21-22.9, 23-24.9, 25-29.9, 30-34.9,  $\geq 35$  kg/m<sup>2</sup>), physical activity (< 3, 3-8.9, 9-17.9, 18-26.9,  $\geq 27$  MET-h/wk), overall dietary pattern (AHEI score, in quintiles), total energy intake (quintiles), smoking status (never, former (1 - 4 cigarettes/d), former (5 - 14 cigarettes/d), former (15 - 24 cigarettes/d), former (25 - 34 cigarettes/d), former (35 - 44 cigarettes/d), former ( $\geq 45$  cigarettes/d), former (unknown cigarettes/d), current (1 - 4 cigarettes/d), current (5 - 14 cigarettes/d), current (15 - 24 cigarettes/d), current (25 - 34 cigarettes/d), current (35 - 44 cigarettes/d), current ( $\geq 45$  cigarettes/d), current (unknown cigarettes/d)), sugar-sweetened beverages consumption (quintiles) and alcohol consumption (0, 0-5, 5-10, 10-15,  $\geq 15$  g/d). We additionally adjusted for menopausal status (yes vs. no), and postmenopausal hormone use (yes vs. no) for women.

\* † Likelihood ratio tests were performed.

**Supplemental Table 6. Sensitivity analyses for the association between coffee consumption and total mortality in the overall population, and pooled multivariate-adjusted hazard ratio was shown.**

|                                                                                                                      | Categories of total coffee |                      |                      |                      |                      | P <sub>non-linearity*</sub> |
|----------------------------------------------------------------------------------------------------------------------|----------------------------|----------------------|----------------------|----------------------|----------------------|-----------------------------|
|                                                                                                                      | 0                          | ≤ 1 cup/d            | 1.1-3 cups/d         | 3.1-5 cups/d         | >5 cups/d            |                             |
| Using cumulative coffee consumption, and stopping updating after cancer and diabetes                                 | 1.00                       | 0.96<br>(0.92, 1.00) | 0.89<br>(0.86, 0.92) | 0.91<br>(0.87, 0.95) | 0.94<br>(0.88, 0.99) | < 0.001                     |
| Using cumulative coffee consumption, and further stopping updating after hypertension, hypercholesterolemia, and CVD | 1.00                       | 0.96<br>(0.92, 1.00) | 0.89<br>(0.86, 0.92) | 0.91<br>(0.87, 0.95) | 0.97<br>(0.92, 1.03) | < 0.001                     |
| Continue updating after diagnosis of chronic disease with 4-year lag                                                 | 1.00                       | 0.99<br>(0.96, 1.04) | 0.93<br>(0.88, 0.97) | 0.94<br>(0.89, 0.98) | 0.94<br>(0.87, 1.00) | < 0.001                     |
| Continue updating after diagnosis of chronic disease adjusting for time-varying hypercholesterolemia                 | 1.00                       | 1.02<br>(0.97, 1.06) | 0.92<br>(0.88, 0.96) | 0.92<br>(0.87, 0.96) | 0.86<br>(0.80, 0.92) | 0.04                        |
| Using baseline exposure with exclusion of hypertension and hypercholesterolemia at baseline                          | 1.00                       | 0.98<br>(0.93, 1.02) | 0.93<br>(0.88, 0.97) | 0.95<br>(0.91, 1.00) | 1.04<br>(0.98, 1.10) | < 0.001                     |

|                                                                                                                      | Categories of caffeinated coffee   |                      |                      |                      |                      |         |
|----------------------------------------------------------------------------------------------------------------------|------------------------------------|----------------------|----------------------|----------------------|----------------------|---------|
|                                                                                                                      | 0                                  | ≤ 1 cup/d            | 1.1-3 cups/d         | 3.1-5 cups/d         | >5 cups/d            |         |
| Using cumulative coffee consumption, and stopping updating after cancer and diabetes                                 | 1.00                               | 0.98<br>(0.95, 1.01) | 0.93<br>(0.90, 0.96) | 0.98<br>(0.94, 1.03) | 0.98<br>(0.91, 1.04) | < 0.001 |
| Using cumulative coffee consumption, and further stopping updating after hypertension, hypercholesterolemia, and CVD | 1.00                               | 0.98<br>(0.95, 1.01) | 0.91<br>(0.88, 0.94) | 0.98<br>(0.94, 1.03) | 1.02<br>(0.96, 1.09) | < 0.001 |
| Continue updating after diagnosis of chronic disease with 4-year lag                                                 |                                    | 1.00                 | 0.95                 | 0.99                 | 0.98                 | 0.014   |
| Continue updating after diagnosis of chronic disease adjusting for time-varying hypercholesterolemia                 | 1.00                               | (0.97, 1.04)         | (0.92, 0.99)         | (0.95, 1.03)         | (0.91, 1.07)         |         |
| Using baseline exposure with exclusion of hypertension and hypercholesterolemia at baseline                          | 1.00                               | 0.98<br>(0.95, 1.01) | 0.93<br>(0.90, 0.96) | 1.00<br>(0.96, 1.06) | 1.10<br>(1.03, 1.14) | < 0.001 |
|                                                                                                                      | Categories of decaffeinated coffee |                      |                      |                      |                      |         |
|                                                                                                                      | 0                                  | ≤ 1 cup/d            | 1.1-3 cups/d         | >3 cups/d            |                      |         |

|                                                                                                                      |      |                      |                      |                      |         |
|----------------------------------------------------------------------------------------------------------------------|------|----------------------|----------------------|----------------------|---------|
| Using cumulative coffee consumption, and stopping updating after cancer and diabetes                                 | 1.00 | 0.89<br>(0.86, 0.91) | 0.87<br>(0.84, 0.90) | 0.94<br>(0.88, 0.99) | < 0.001 |
| Using cumulative coffee consumption, and further stopping updating after hypertension, hypercholesterolemia, and CVD | 1.00 | 0.86<br>(0.86, 0.88) | 0.84<br>(0.82, 0.88) | 0.95<br>(0.88, 1.01) | < 0.001 |
| Continue updating after diagnosis of chronic disease with 4-year lag                                                 | 1.00 | 0.90<br>(0.88, 0.92) | 0.89<br>(0.87, 0.93) | 0.91<br>(0.85, 0.98) | < 0.001 |
| Continue updating after diagnosis of chronic disease adjusting for time-varying hypercholesterolemia                 | 1.00 | 0.90<br>(0.87, 0.92) | 0.88<br>(0.86, 0.92) | 0.90<br>(0.84, 0.97) | < 0.001 |
| Using baseline exposure with exclusion of hypertension and hypercholesterolemia at baseline                          | 1.00 | 0.93<br>(0.89, 0.96) | 0.93<br>(0.89, 0.97) | 0.93<br>(0.86, 1.00) | < 0.001 |

Models were adjusted for age, baseline disease status (hypertension, hypercholesterolemia, diabetes), BMI (< 20.9, 21-22.9, 23-24.9, 25-29.9, 30-34.9,  $\geq 35$  kg/m<sup>2</sup>), physical activity (< 3, 3-8.9, 9-17.9, 18-26.9,  $\geq 27$  MET-h/wk), overall dietary pattern (AHEI score, in quintiles), total energy intake (quintiles), smoking status (never, former (1 - 4 cigarettes/d), former (5 - 14 cigarettes/d), former (15 - 24 cigarettes/d), former (25 - 34 cigarettes/d), former (35 - 44 cigarettes/d), former ( $\geq 45$  cigarettes/d), former (unknown cigarettes/d), current (1 - 4 cigarettes/d), current (5 - 14 cigarettes/d), current (15 - 24 cigarettes/d), current (25 - 34 cigarettes/d), current (35 - 44

cigarettes/d), current ( $\geq 45$  cigarettes/d), current (unknown cigarettes/d), sugar-sweetened beverages consumption (quintiles) and alcohol consumption (0, 0-5, 5-10, 10-15,  $\geq 15$  g/d). We additionally adjusted for menopausal status (yes vs. no), and postmenopausal hormone use (yes vs. no) for women.

\* A likelihood ratio test was performed.

**Supplemental Table 7. Sensitivity analyses for the association between coffee consumption and total mortality among never smokers, and pooled multivariate-adjusted hazard ratio was shown.**

|                                                                                                                      | Categories of total coffee |                      |                      |                      |                      | P <sub>non-linearity*</sub> |
|----------------------------------------------------------------------------------------------------------------------|----------------------------|----------------------|----------------------|----------------------|----------------------|-----------------------------|
|                                                                                                                      | 0                          | ≤ 1 cup/d            | 1.1-3 cups/d         | 3.1-5 cups/d         | >5 cups/d            |                             |
| Using cumulative coffee consumption, and stopping updating after cancer and diabetes                                 | 1.00                       | 0.93<br>(0.87, 0.99) | 0.89<br>(0.83, 0.95) | 0.83<br>(0.76, 0.90) | 0.83<br>(0.72, 0.96) | 0.26                        |
| Using cumulative coffee consumption, and further stopping updating after hypertension, hypercholesterolemia, and CVD | 1.00                       | 0.93<br>(0.87, 0.99) | 0.89<br>(0.83, 0.95) | 0.84<br>(0.78, 0.91) | 0.85<br>(0.74, 0.97) | 0.87                        |
| Continue updating after diagnosis of chronic disease with 4-year lag                                                 | 1.00                       | 0.96<br>(0.90, 1.03) | 0.93<br>(0.88, 1.00) | 0.80<br>(0.73, 0.86) | 0.85<br>(0.72, 1.00) | 0.25                        |
| Continue updating after diagnosis of chronic disease adjusting for time-varying hypercholesterolemia                 | 1.00                       | 0.99<br>(0.93, 1.06) | 0.91<br>(0.85, 0.96) | 0.79<br>(0.73, 0.85) | 0.73<br>(0.61, 0.87) | 0.30                        |
| Using baseline exposure with exclusion of hypertension and hypercholesterolemia at baseline                          | 1.00                       | 0.95<br>(0.87, 1.01) | 0.93<br>(0.88, 1.00) | 0.82<br>(0.75, 0.89) | 0.91<br>(0.79, 1.04) | 0.88                        |



|                                                                                                                      | Categories of caffeinated coffee   |                      |                      |                      |                      |       |
|----------------------------------------------------------------------------------------------------------------------|------------------------------------|----------------------|----------------------|----------------------|----------------------|-------|
|                                                                                                                      | 0                                  | ≤ 1 cup/d            | 1.1-3 cups/d         | 3.1-5 cups/d         | >5 cups/d            |       |
| Using cumulative coffee consumption, and stopping updating after cancer and diabetes                                 | 1.00                               | 1.00<br>(0.95, 1.05) | 0.91<br>(0.86, 0.96) | 0.87<br>(0.79, 0.95) | 0.80<br>(0.65, 0.99) | 0.34  |
| Using cumulative coffee consumption, and further stopping updating after hypertension, hypercholesterolemia, and CVD | 1.00                               | 1.00<br>(0.93, 1.05) | 0.88<br>(0.83, 0.93) | 0.89<br>(0.82, 0.98) | 0.79<br>(0.66, 0.97) | 0.91  |
| Continue updating after diagnosis of chronic disease with 4-year lag                                                 | 1.00                               | 0.99<br>(0.94, 1.05) | 0.90<br>(0.85, 0.96) | 0.85<br>(0.76, 0.94) | 0.81<br>(0.63, 1.06) | 0.084 |
| Continue updating after diagnosis of chronic disease adjusting for time-varying hypercholesterolemia                 | 1.00                               | 0.99<br>(0.94, 1.05) | 0.89<br>(0.84, 0.94) | 0.80<br>(0.72, 0.88) | 0.77<br>(0.59, 1.01) | 0.07  |
| Using baseline exposure with exclusion of hypertension and hypercholesterolemia at baseline                          | 1.00                               | 0.97<br>(0.92, 1.02) | 0.92<br>(0.87, 0.99) | 0.85<br>(0.76, 0.94) | 0.94<br>(0.78, 1.12) | 0.91  |
|                                                                                                                      | Categories of decaffeinated coffee |                      |                      |                      |                      |       |
|                                                                                                                      | 0                                  | ≤ 1 cup/d            | 1.1-3 cups/d         | >3 cups/d            |                      |       |

|                                                                                                                      |      |                      |                      |                      |       |
|----------------------------------------------------------------------------------------------------------------------|------|----------------------|----------------------|----------------------|-------|
| Using cumulative coffee consumption, and stopping updating after cancer and diabetes                                 | 1.00 | 0.92<br>(0.87, 0.96) | 0.90<br>(0.84, 0.95) | 0.93<br>(0.81, 1.08) | 0.016 |
| Using cumulative coffee consumption, and further stopping updating after hypertension, hypercholesterolemia, and CVD | 1.00 | 0.90<br>(0.86, 0.95) | 0.89<br>(0.84, 0.95) | 0.97<br>(0.85, 1.12) | 0.008 |
| Continue updating after diagnosis of chronic disease with 4-year lag                                                 | 1.00 | 0.95<br>(0.90, 0.99) | 0.97<br>(0.91, 1.03) | 0.91<br>(0.76, 1.09) | 0.22  |
| Continue updating after diagnosis of chronic disease adjusting for time-varying hypercholesterolemia                 | 1.00 | 0.94<br>(0.90, 0.98) | 0.92<br>(0.87, 0.98) | 0.89<br>(0.75, 1.06) | 0.20  |
| Using baseline exposure with exclusion of hypertension and hypercholesterolemia at baseline                          | 1.00 | 0.95<br>(0.90, 0.99) | 0.93<br>(0.87, 0.99) | 0.87<br>(0.74, 1.04) | 0.17  |

\* A likelihood ratio test was performed.

**Supplemental Table 8. The association between coffee consumption and risk of total mortality among never smokers by Cox model with inverse probability weighting.**

| <b>Total coffee</b>                         |      |                      |                      |                      |                      |
|---------------------------------------------|------|----------------------|----------------------|----------------------|----------------------|
| Intake (cups/d)                             | 0    | ≤ 1 cup/d            | 1.1-3 cups/d         | 3.1-5 cups/d         | >5 cups/d            |
| Multivariate-adjusted hazard ratio (95% CI) | 1.00 | 0.95<br>(0.90, 1.00) | 0.93<br>(0.87, 0.98) | 0.86<br>(0.80, 0.93) | 0.87<br>(0.77, 0.98) |
| <b>Caffeinated coffee</b>                   |      |                      |                      |                      |                      |
| Intake (cups/d)                             | 0    | ≤ 1 cup/d            | 1.1-3 cups/d         | 3.1-5 cups/d         | >5 cups/d            |
| Multivariate-adjusted hazard ratio (95% CI) | 1.00 | 0.97<br>(0.94, 1.02) | 0.92<br>(0.87, 0.96) | 0.90<br>(0.82, 0.98) | 0.89<br>(0.76, 1.05) |
| <b>Decaffeinated coffee</b>                 |      |                      |                      |                      |                      |
| Intake (mg/d)                               | 0    | ≤ 1 cup/d            | 1.1-3 cups/d         | >3 cups/d            |                      |
| Multivariate-adjusted hazard ratio (95% CI) | 1.00 | 0.95<br>(0.91, 0.99) | 0.93<br>(0.87, 0.99) | 0.89<br>(0.78, 1.03) |                      |

The model adjusted for age, baseline disease status (hypertension, hypercholesterolemia, diabetes), BMI (< 20.9, 21-22.9, 23-24.9, 25-29.9, 30-34.9, ≥ 35 kg/m<sup>2</sup>), physical activity (< 3, 3-8.9, 9-17.9, 18-26.9, ≥ 27 MET-h/wk), overall dietary pattern (AHEI score, in quintiles), total energy intake (quintiles), sugar-sweetened beverages consumption (quintiles) and alcohol consumption (0, 0-5, 5-10, 10-15, ≥ 15 g/d). We additionally adjusted for menopausal status (yes vs. no), and postmenopausal hormone use (yes vs. no) for women. Caffeinated and decaffeinated coffee adjusted for each other.

For the weight calculation, the weight for the non-cases was 1, while the weights for the death cases were calculated in a way that the composition of the total mortality among the never smokers was the same as the overall population.

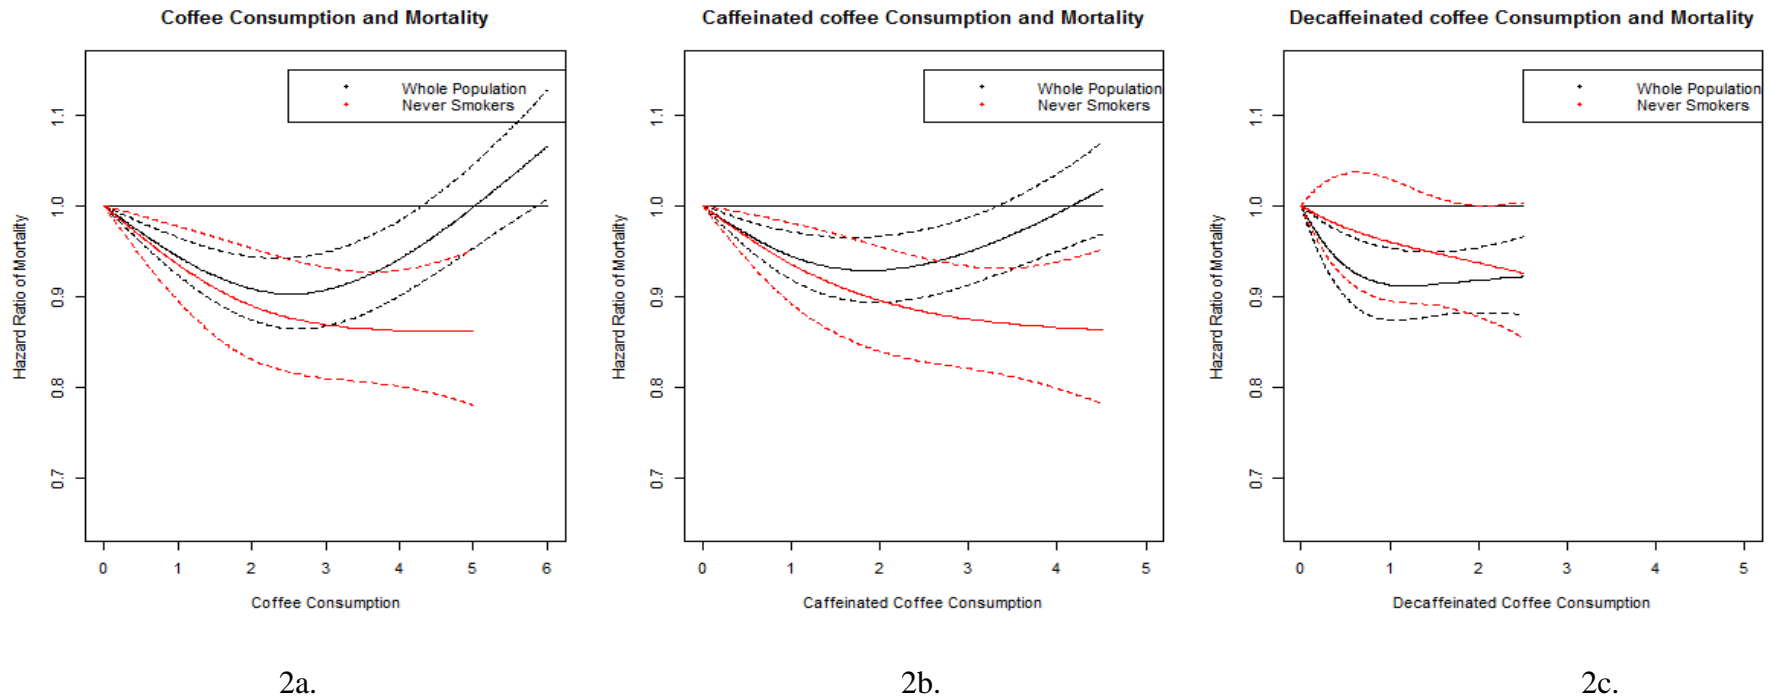

**Supplemental Figure 2. Baseline coffee consumption and risk of mortality in the overall population and among never smokers in NHS. 2a. Total coffee consumption and risk of mortality. 2b. Caffeinated coffee consumption and risk of mortality. 2c. Decaffeinated coffee consumption and risk of mortality.**

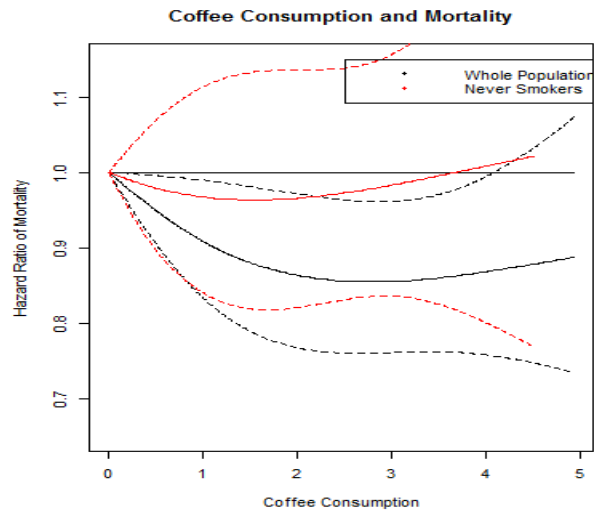

3a.

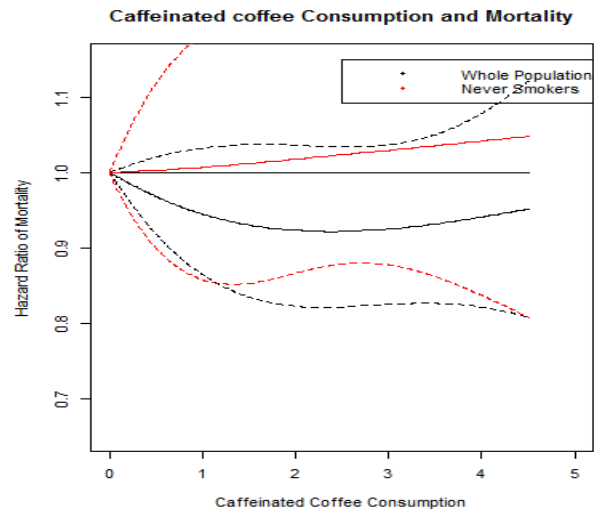

3b.

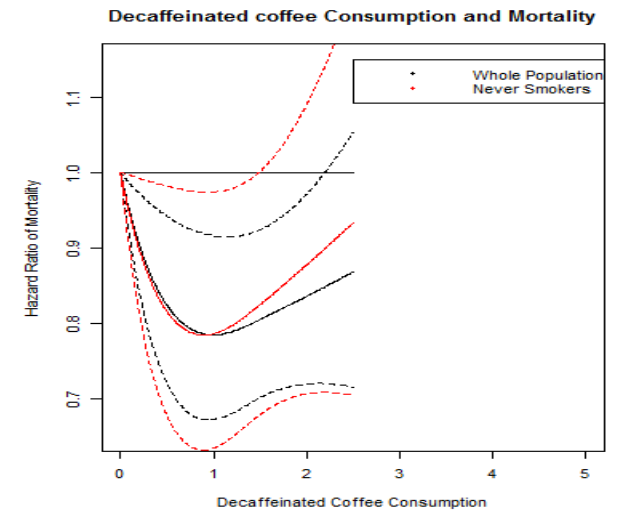

3c.

**Supplemental Figure 3. Baseline coffee consumption and risk of mortality in the overall population and among never smokers in NHS 2. 3a. Total coffee consumption and risk of mortality. 3b. Caffeinated coffee consumption and risk of mortality. 3c. Decaffeinated coffee consumption and risk of mortality.**

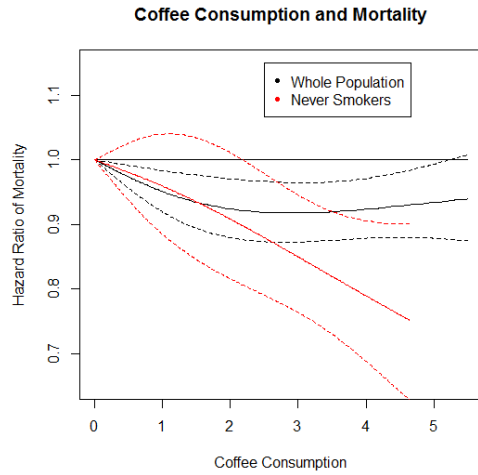

4a.

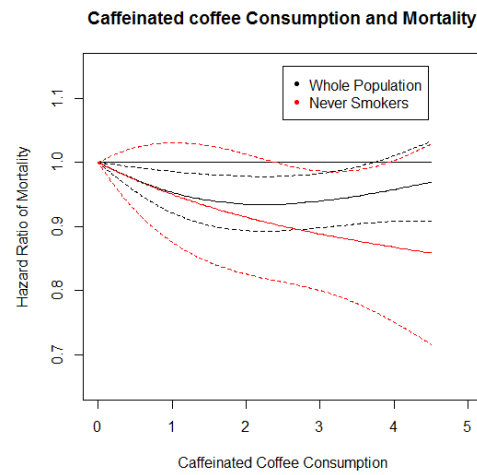

4b.

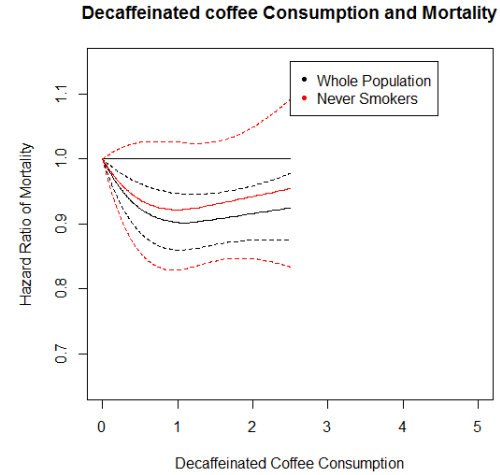

4c.

**Supplemental Figure 4. Baseline coffee consumption and risk of mortality in the overall population and among never smokers in HPFS. 4a. Total coffee consumption and risk of mortality. 4b. Caffeinated coffee consumption and risk of mortality. 4c. Decaffeinated coffee consumption and risk of mortality.**

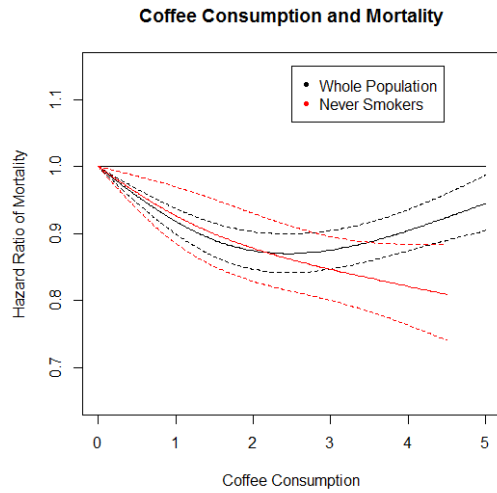

5a.

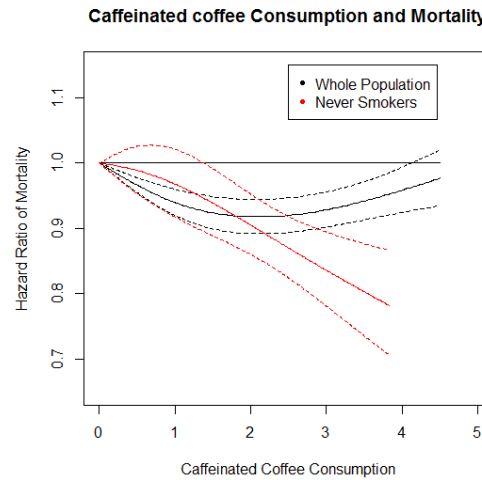

5b.

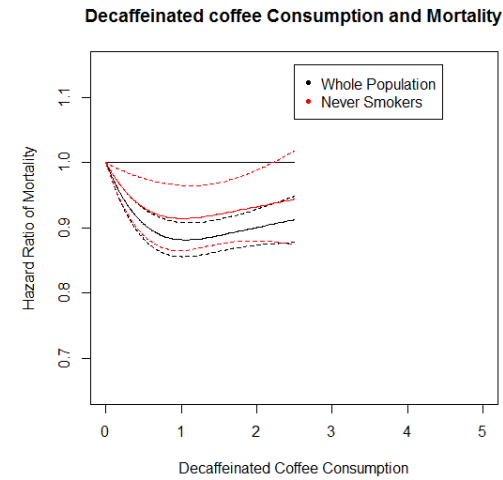

5c.

**Supplemental Figure 5. Cumulative coffee consumption and stopping updating when cancer and diabetes develop, and risk of mortality in the overall population and among never smokers by pooled across the three cohorts. 5a. Total coffee consumption and risk of mortality. 5b. Caffeinated coffee consumption and risk of mortality. 5c. Decaffeinated coffee consumption and risk of mortality.**

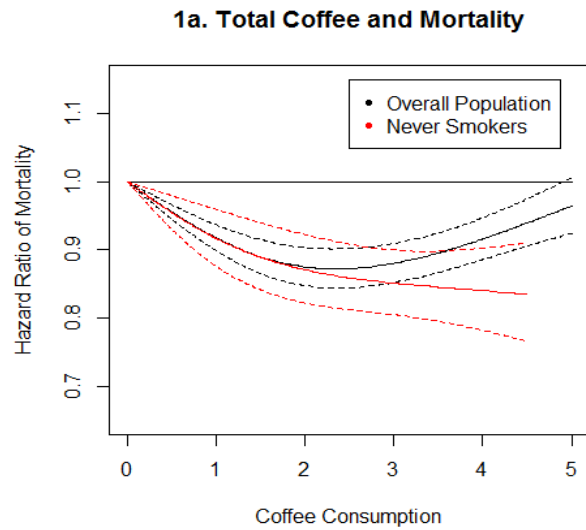

6a.

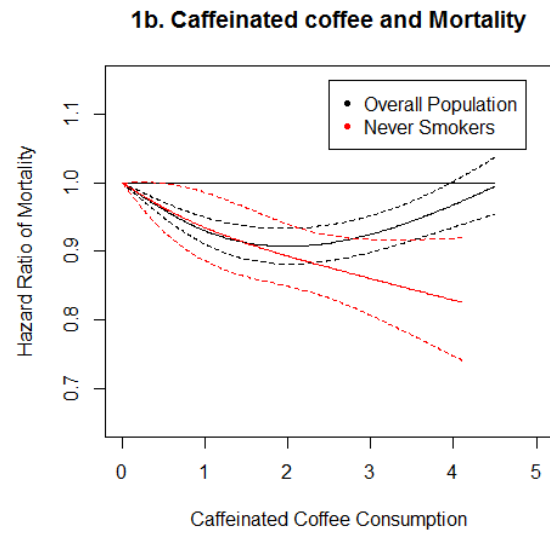

6b.

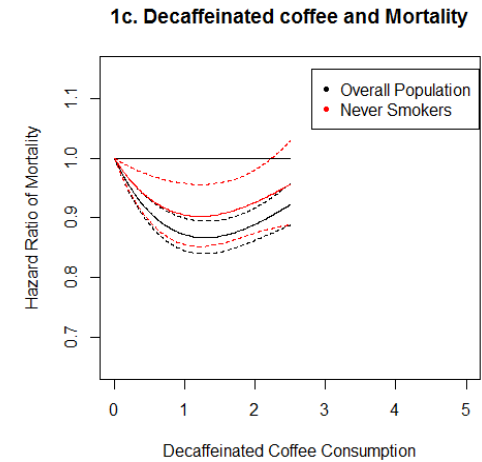

6c.

**Supplemental Figure 6. Cumulative coffee consumption and further stopping updating when hypertension, hypercholesterolemia develop, and risk of mortality in the overall population and among never smokers by pooled across the three cohorts. 6a. Total coffee consumption and risk of mortality. 6b. Caffeinated coffee consumption and risk of mortality. 6c. Decaffeinated coffee consumption and risk of mortality.**



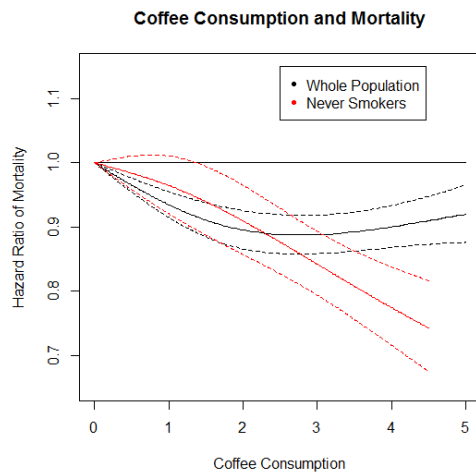

7a.

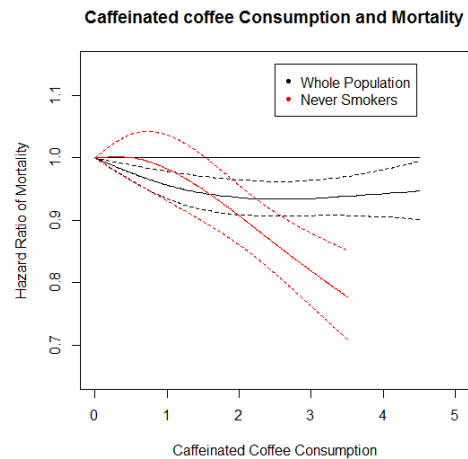

7b.

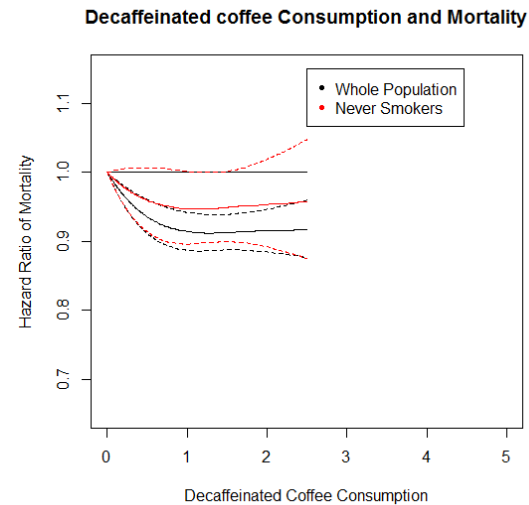

7c.

**Supplemental Figure 7. Continue updating coffee consumption after diagnosis of chronic disease with 4-year lag and risk of mortality in the overall population and among never smokers pooled across the three cohorts. 7a. Total coffee consumption and risk of mortality. 7b. Caffeinated coffee consumption and risk of mortality. 7c. Decaffeinated coffee consumption and risk of mortality.**

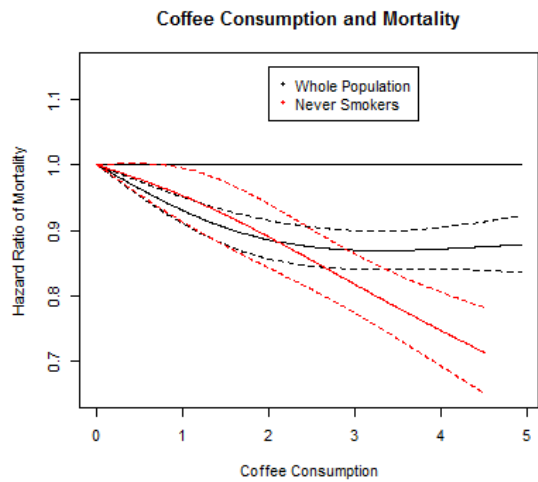

8a.

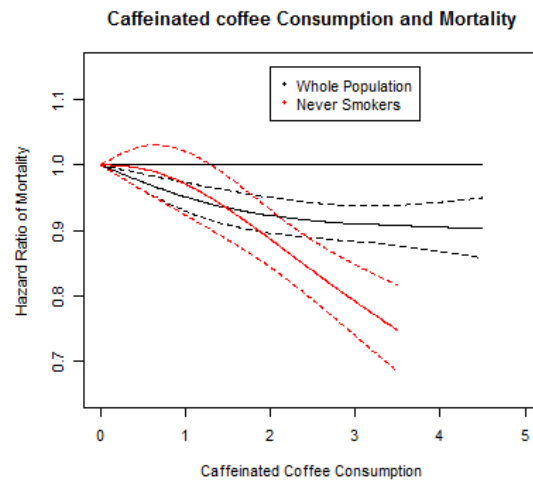

8b.

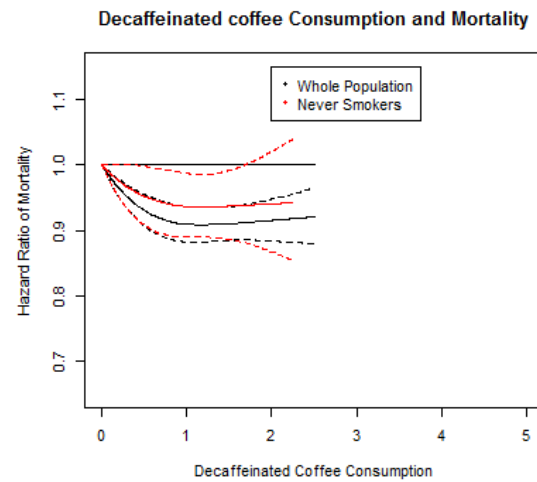

8c.

**Supplemental Figure 8. Continue updating coffee consumption after diagnosis of chronic disease adjusting for hypercholesterolemia as a time varying covariates and risk of mortality in the overall population and among never smokers pooled across the three cohorts. 8a. Total coffee consumption and risk of mortality. 8b. Caffeinated coffee consumption and risk of mortality. 8c. Decaffeinated coffee consumption and risk of mortality.**

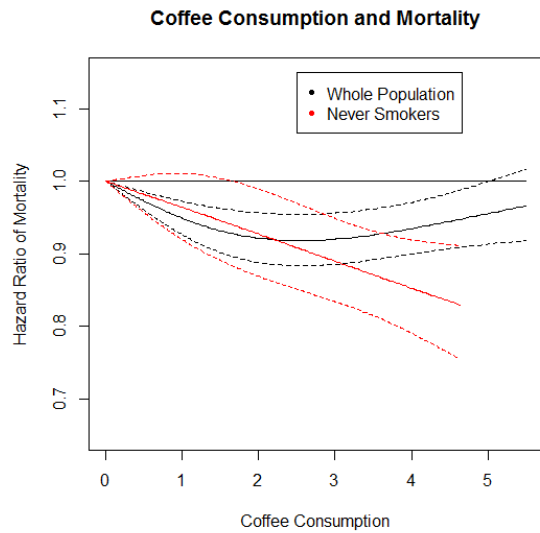

9a.

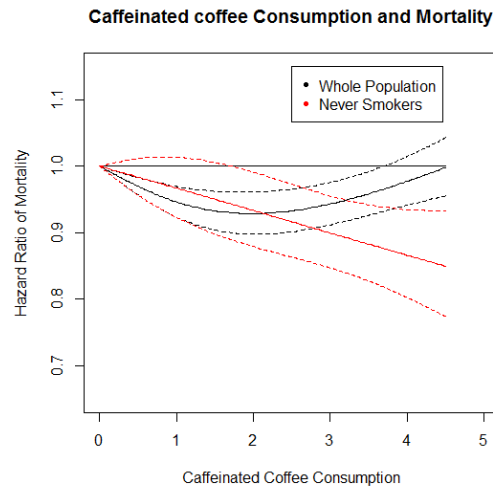

9b.

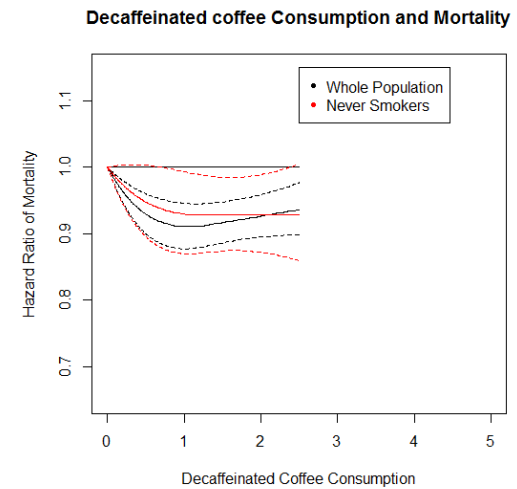

9c.

**Supplemental Figure 9. Baseline coffee consumption and risk of mortality in the overall population and among never smokers further excluding hypertension, hypercholesterolemia, and diabetes cases at baseline, pooled across the three cohorts. 9a. Total coffee consumption and risk of mortality. 9b. Caffeinated coffee consumption and risk of mortality. 9c. Decaffeinated coffee consumption and risk of mortality.**
